# Supplementary material for: Mechanisms controlling giant sea salt aerosol size distributions along a tropical orographic coastline
Source: Copernicus journal article supplement (doi:10.5194/egusphere-2023-1387), 2023-07-07
Supplement: Supplementary file [file egusphere-2023-1387-AC2-supplement.pdf]

## Response to Reviewer #2

By Katherine L. Ackerman, Alison D. Nugent, and Chung Taing

This manuscript presents the results of a sea salt aerosol (SSA) study in coastal zone (Hawaii) at moderate wind speeds (Trade winds up to 7 m/s). Super-micron SSA size distributions (dry radii  $> 2.8 \mu\text{m}$ ) were measured with a miniature impaction instrument, mini-GNI, specifically designed for these observations. The size distributions in coastal zone were compared to SSA size distributions in open ocean and differences up to a factor of 5 are reported. Several mini-GNIs were deployed on a kite to obtain the vertical profiles of SSA number concentrations from 80 to 650 m height. Various environmental data were collected in situ (wind, wave height, air temperature, relative humidity) to identify the most suitable forcing variables for the observed SSA size distributions. Data generated with WRF model were used to simulate SSA trajectories and study the effects of the coastal topography on the SSA vertical dynamics.

Super-micron size distributions of SSA, as well as their vertical profiles, in coastal zone are indeed severely understudied. Though fewer and less frequently occurring, large SSA particles, with their large areas and volumes, contribute disproportionately to various aerosol effects, from scattering and absorption to formation of cloud condensation nuclei. The differences between open ocean and coastal zone conditions yield dramatic variations of SSA production, yet the governing processes are not well characterized. Studies like the one presented here are sorely missing and these new results represent a great new addition of data on SSA production and mixing as well as on processes affecting them.

This is a very well planned and executed study involving a myriad of observations and data. The manuscript is well organized and written. Considering the amount of used instrumentation, modeling, data collection, and analyses, the manuscript is concise and clear. The results are novel and represent valuable contribution to the representation and understanding of air-sea interaction processes. I recommend this manuscript for publication at ACP. I have minor questions and remarks. These are listed below by line number, not importance.

We extend our heartfelt gratitude to the reviewer for the thorough review of our paper, as well as words of encouragement for this study. Their meticulous analysis has significantly enhanced the readability and conclusions of our paper. The reviewer's praise is encouraging for further work in this field, and we're grateful for the time and effort invested by the reviewer in evaluating our paper and offering suggestions. We look forward to implementing their suggestions to further elevate the quality of our paper. The specific comments are addressed below:

1. Line 23: Suggest change "SSP" to "sea salt particles" (thus avoid defining an acronym that is not further used in the abstract)  
Thank you for catching this! We've changed SSP to sea salt particle.
2. Lines 30 and 32: Acronyms SSA and SSP seem to be used interchangeably throughout the text. If so, better use "SSA" and "SSA particles" for consistency. If they are meant to represent some differences, it would be good to mention those here in lines 30-31 on first encounter.

Thank you for your careful attention to this detail. Literature surrounding SSA has been largely inconsistent in the reference to the aerosol species in general vs. the physical particles in the atmosphere, and our intention was to be more discrete in this manuscript. After re-reading the introduction, however, we agree that our use of SSA vs. SSP was inconsistent. We have updated these sections and carefully re-read the consequent sections to ensure that our use of SSA remains as a broad reference to the aerosol species (which encompasses a broad range of categories like measurement types, chemical properties, or other factors describing the aerosol species), while the use of SSP is reserved for discussion of the observation, quantification, and properties of the particles themselves.

3. Line 31: Symbol  $r_d$  is used with both italic and non-italic (e.g., line ) subscript throughout the text and in the equations. Use one notation consistently. All other variables are non-italic. That is fine. Just check the ACP requirements for math/variables style.  
Thank you for noticing this – we’ve updated the text so that, with the exception of the Greek letters, the variables are consistently non-italicized to match each other and the figures.
4. Line 34: “orders of magnitude less often”—Is this to say that the large particles are fewer in number and occur less frequently? Or is this phrase strictly for the frequency of occurrence?  
Thank you for the clarification question – we’ve changed the sentence as follows:  
“These giant SSPs (GSSPs,  $r_d > 0.5 \mu\text{m}$ ) exist in atmospheric concentrations that are orders of magnitude less than their smaller counterparts, however.”
5. Line 68: Remove “the” to read “winds below it act to dilute the SSA concentration”  
The section now reads “where winds above this threshold add to the SSA concentrations and winds below it act to dilute the SSA concentration.”
6. Line 96: Remove comma before “sea state”  
This change has been made.
7. Line 112: Remove “sea salt aerosol size distribution” because acronym SSA-SD is already defined in line 91.  
This change has been addressed.
8. Line 133: Introduce the concentration units in parentheses here on first definition of N and do not repeat them anymore; i.e., no need to include units in lines 134, 257, 258, 351, etc) unless they follow a specific number.  
Thank you for this helpful clarification! We’ve changed the appropriate sentences so that the variable name and units are defined together only once.
9. Line 133: Unless ACP writing style allows, you should not start a sentence with a symbol, like here starting with  $r_{2.8}$  and in line 135 with  $r_d$ . There are several other cases (e.g., line 255). Likewise, should not start a sentence with a number as in line 235.  
Thank you, the text has been worked around to ensure that sentences do not start with variables.

10. Line 136: After introducing  $r_{2.8}$  and B in lines 131-135, it would be good to specifically say here that you call these shape parameters and also give their physical meaning, besides their definition.

Thank you for pointing this out – we want these equations to feel connected to the actual size distributions, as we refer to these variables quite a bit in the future sections. We’ve reworked the following paragraph for clarity:

“where  $dN(r_d/dr_d)$  is the concentration ( $N, m^{-3} \mu m^{-1}$ ) at the bin (width  $0.2 \mu m$ ) centered on the dry particle radius ( $r_d$ ). The number concentration ( $r_{2.8}, m^{-3} \mu m^{-1}$ ) is for a dry particle with a radius of  $2.8 \mu m$  which is the smallest observable SSP size in this study. Because the function is fit across a range of dry particles valid for SSPs of  $r_d \geq 2.8 \mu m$  and visualized on a lognormal Y-axis,  $r_{2.8}$  represents the Y-intercept for a given SSA-SD. The second changing parameter is B, which is the inverse of the characteristic radius for the size distribution with  $B > 0$ . The lognormal Y-axis represents the exponential decay equation into a linear line, meaning B represents the slope of a SSA-SD on a lognormal Y-Axis.

Both  $r_{2.8}$  and B become the two SSA-SD shape parameters that change between SSA-SDs for different altitudes and environmental conditions and are analyzed further in this study. The inclusion of the  $-2.8 \mu m$  in the exponent is implicit in the remainder of the equations used in this study due to the sampling range limitations. This function was fit to each size distribution from  $2.8 \mu m$  through the largest sized particle for continuous bins; i.e., the function stops fitting to particles when there was a break in observed SSP bins (Fig. 1b, red line). These exponential fits are then used in this study to represent the SSA-SDs for given samples if the  $r^2$  values of the fits were  $> 0.90$ .”

11. Table 1 caption: Change to  $H_s$  (m) and Per (s) for consistency with the listing of all other variables. Case 5 is missing in column “Sample #”; perhaps it has been discarded due to CE  $< 40\%$  or some other reason. It would be good to mention it to avoid impression of typo on the order of Sample #.

Thank you for these suggestions! Significant wave height was replaced with  $H_s$ , however, Period remained as “mean wave period (Per., s) because this variable was not abbreviated elsewhere in the text.

A sentence was added in the table caption for clarity that Sample #5 was removed from this analysis because the altitudes of the samples were not  $> 80$  m.

“Sampling date #5 was not included in this analysis as the altitudes of all the samples were  $< 80$  m.”

12. Line 181: Altitude  $z$  is given in italic and non-italic. Here and everywhere, please use the same notation.

Thank you for noticing this, the remainder of the paper has been updated for non-italic values for everything except Greek letters.

13. Line 202: Need to define what is “h-values”

Thank you for noticing this – “pressure derived height values” was added after eta-values in the text.

14. Lines 205-209: Acronyms RRTMG, PBL, EPSSM, and NCAR are not defined. They are not used anywhere else. Better not to use acronyms in this case.

Thank you for these suggestions – the acronyms were removed and replaced with their original meanings.

15. Line 253: “Cumulative” seems to mean averaged over a range of altitudes and a range of winds speeds. If so, better say this specifically to avoid any confusion with the statistical meaning of “cumulative.”

Thank you for noticing this! We have changed this section title to be “Averaged SSA-SDs in the Coast vs. Open Ocean”, as the figure this section is referencing is a SSA-SDs rather than a cumulative concentration plot.

16. Line 262: Short-hand W53 is not introduced. Good place is line 160 regarding historical samples; introduce it as “Woodcock (1953, W53)”

Thank you for this suggestion, however, W53 is defined in section “2.2.2 Historical Samples” on line 166 of the original draft.

17. Figure 7 caption: Put the units for  $U_{10}$  and  $H_s$  in parentheses.

Thank you for noticing this. Because  $U_{10}$  and  $H_s$  are already defined, we chose to remove the long names for the variables and the units put in parentheses. The sentence now reads: “SSA-SDs were binned and averaged by two environmental parameters - (a)  $U_{10}$  ( $\text{m s}^{-1}$ ) and (b)  $H_s$  (m) - to visualize the organization of these size distributions to changes in the wind and waves“

18. Figure 9 caption: How were these altitude bins chosen? If the criterion for the altitude bin formation changed, would that affect the shape of the vertical profiles?

This is a great question that doesn't appear well clarified in our current manuscript.

Throughout sampling, we explored a variety of altitudes and methodologies, resulting in a wide distribution of altitudes across our many sampling days, however, a general sampling strategy was to try for at least three different altitudes approximately 100-150 m apart. As a result, our distribution of samples across altitudes is a trimodal distribution, with the three modes around approximately 150 m, 300 m, and 450 m. The initial decision for choosing bins were to maintain a majority of the samples within three evenly-spaced bins.

Additionally, we only chose days that had samples in each bin, as to not skew bins from days without a complete representation of altitudes for those environmental conditions.

Below is an additional plot showing our raw distribution of samples across altitude bins, the current distribution in the previous manuscript, and a new distribution encompassing a slightly different range between the three bins. The old distribution had altitude bins between 80 m, 128.4 m, 255.8 m, 383.2 m, 510.6 m and 638 m. The new distribution is not uniform, with bins from 80 m, 200 m, 360 m, and 510 m, but encompasses all samples except for those > 600 m and has a more even sample count between the bins. We have excluded the highest-level samples as they are too far away from the remaining distribution of samples and we do not have similar sample counts for a fourth bin.

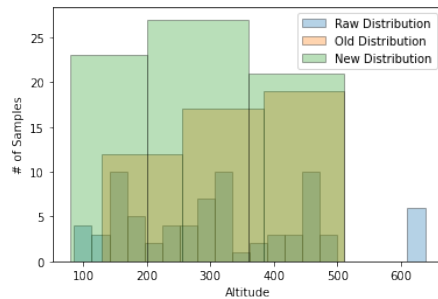

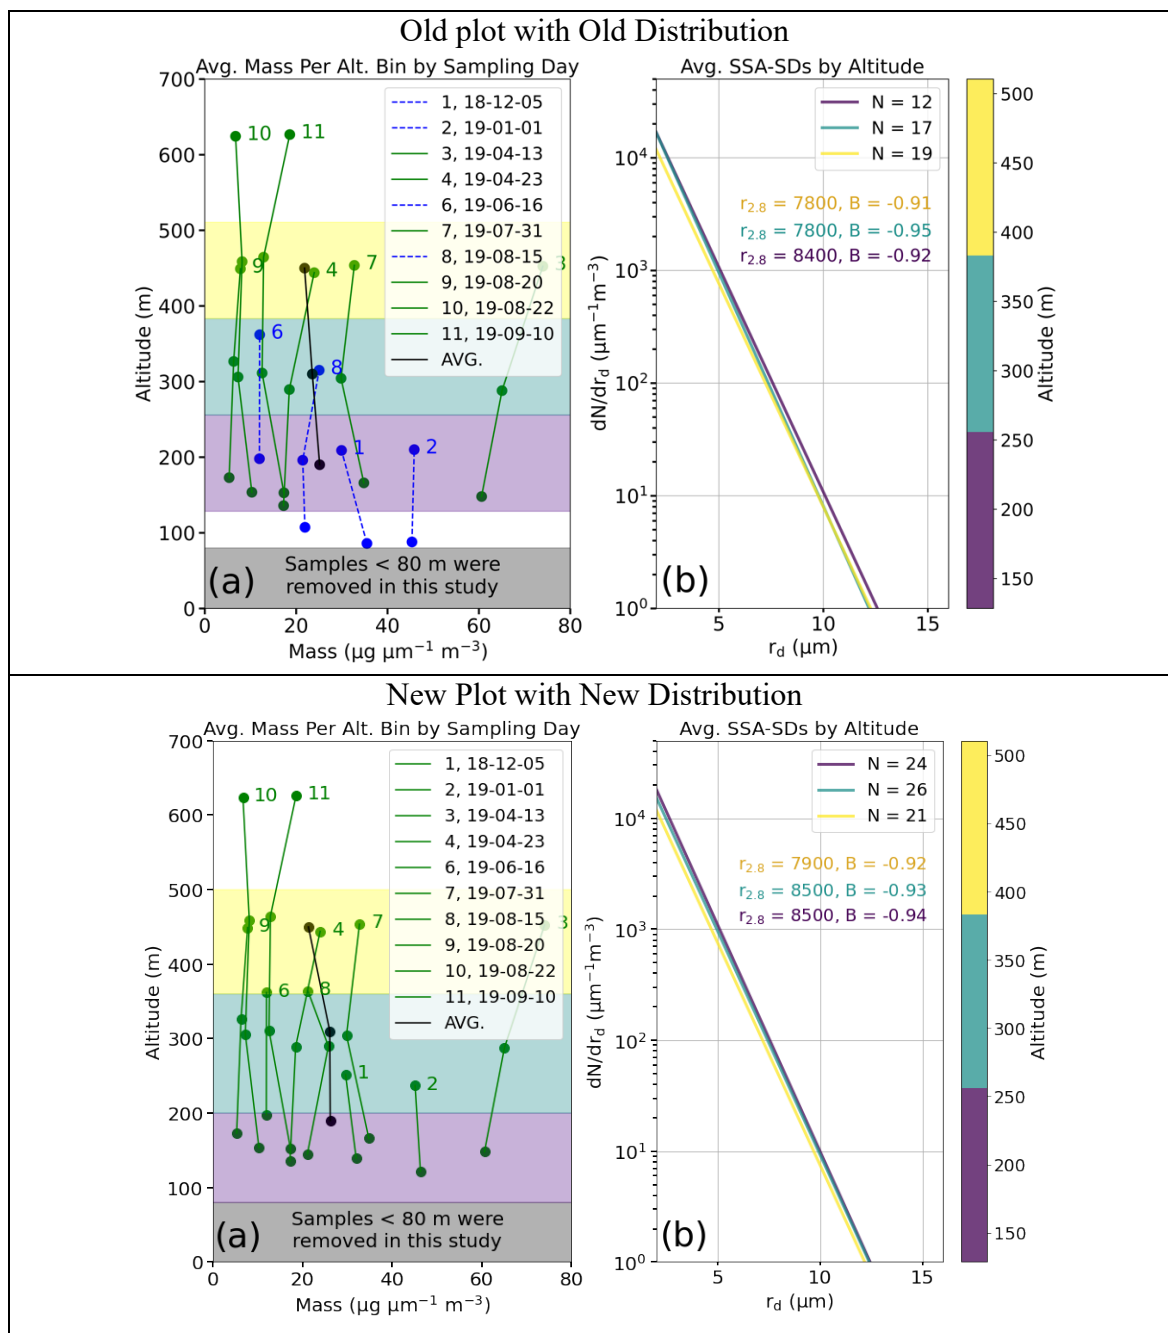

Overall, changing these bins does not change our conclusions, but the reviewer makes an excellent point about the bins not being obvious. Therefore, we updated Figure 9 with the new, more inclusive distribution. The text in this section has been modified to account for the changes in bin ranges and reference to the physical changes in the figure, but the conclusions remain unmodified as there are no major differences. We are grateful to the reviewer for raising these points, and hope that this information helps to strengthen our justifications for the bins in this plot.

19. Line 364: I am not sure I see an order of magnitude change of the velocity. From surface to 1000 m altitude, the velocity changes at most from 0.1 to 0.35 m/s. Please paraphrase for clarity.

Thank you for catching this mistake – it does not vary by an order of magnitude from the time ocean surface to cloud base. We've updated the sentence to say:

“Fall velocities from Figure 4b show that a singular particle's fall velocity can increase significantly from the ocean surface to cloud base.”

20. Line 392: Please fix typo to read “meaning they are unlikely to”

Thank you for noticing this mistake, the text has been updated to say the above.

21. Line 439: Please remove “so when” to read “southern shores when SSTs are”

Thank you again for noticing this typo – we've updated the text accordingly.

22. Line 440: Suggest change to read “across a period of one year”.

Thank you for this suggestion – we've changed the text to read:

“This study took place on an eastern coastline across a period of one year....”

23. Line 449: The citations should be all in one set of parentheses to read “(Porter and Clarke,1997; Blanchard et al., 1984)”

Thank you for noticing this error – these citations have been put into paratheses.

24. Line 463: Please fix the parentheses to read “Table 2 from Grythe et al. (2014) shows”

Thank you for noticing this error – the citation has been updated to match the above suggestion.
